# Supplementary material for: TCF7L2 Variation and Proliferative Diabetic Retinopathy
Source: PubMed Central journal article supplement — Diabetes. 2013 Jun 14;62(7):2613–7. doi: 10.2337/db12-1093 (PMC3712060; doi:10.2337/db12-1093), 2013-06-14
Supplement: supp_db12-1093_DB121093SupplementaryData.pdf [file supp_db12-1093_DB121093SupplementaryData.pdf]

SUPPLEMENTARY DATA

**Supplementary Figure 1.** The expression of *VEGFA* and *TCF7L2* in tunicamycin-treated lymphoblastoid cells. A. There is no significant difference in total expression levels of *TCF7L2* in cell lines with a *TCF7L2* rs7903146-CC or rs7903146-TT genotype at the baseline or after tunicamycin-treatment (at the baseline,  $P = 0.853$ ; after tunicamycin-treatment,  $P = 0.390$ ). B. There is no significant difference between the expression of *VEGFA* in cell lines with a *TCF7L2* rs7903146-CC or rs7903146-TT genotype at the baseline ( $P = 0.927$ ); However, there was a significant higher expression of *VEGFA* in the cell lines with a *TCF7L2* rs7903146-TT than in rs7903146-CC after tunicamycin-treatment ( $P = 0.004$ ). C. Without calculation of fold change, there was no correlation of the expression of the total transcripts between *TCF7L2* and *VEGFA* at the baseline or after tunicamycin-treatment (pearson  $r = -0.1$ ). D. Compared with the expression of *GAPDH* at the baseline, the expression of *GAPDH* is not significantly altered after tunicamycin treatment. ( $P = 0.405$ ,  $n = 18$ ).

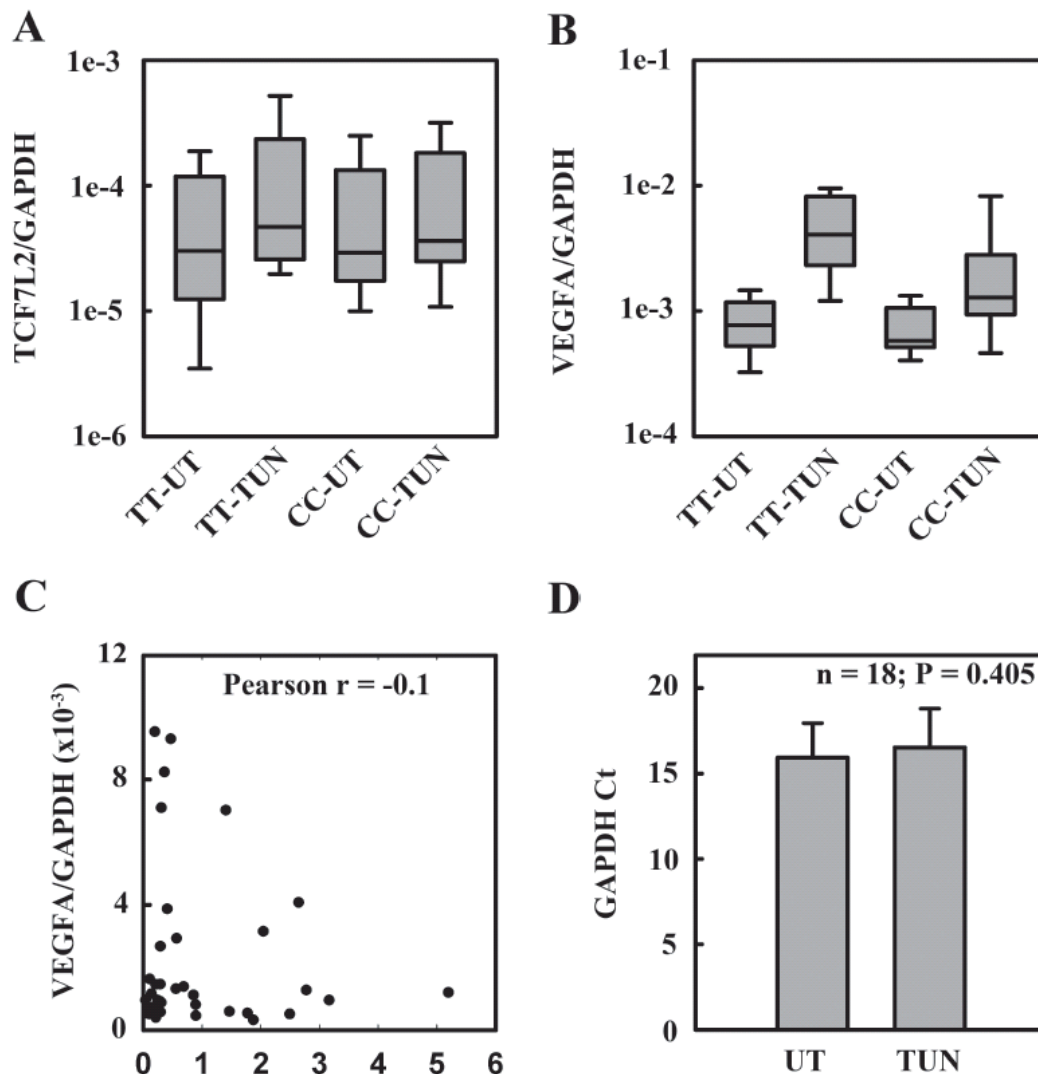

SUPPLEMENTARY DATA

**Supplementary Figure 2.** Activation of ER stress in the lymphoblastoid cells treated with tunicamycin. In the cells treated with tunicamycin, ER stress was induced as shown by alternative splicing of *XBPI*. Two bands (unspliced and spliced band) were detected for the tunicamycin-treated cells.

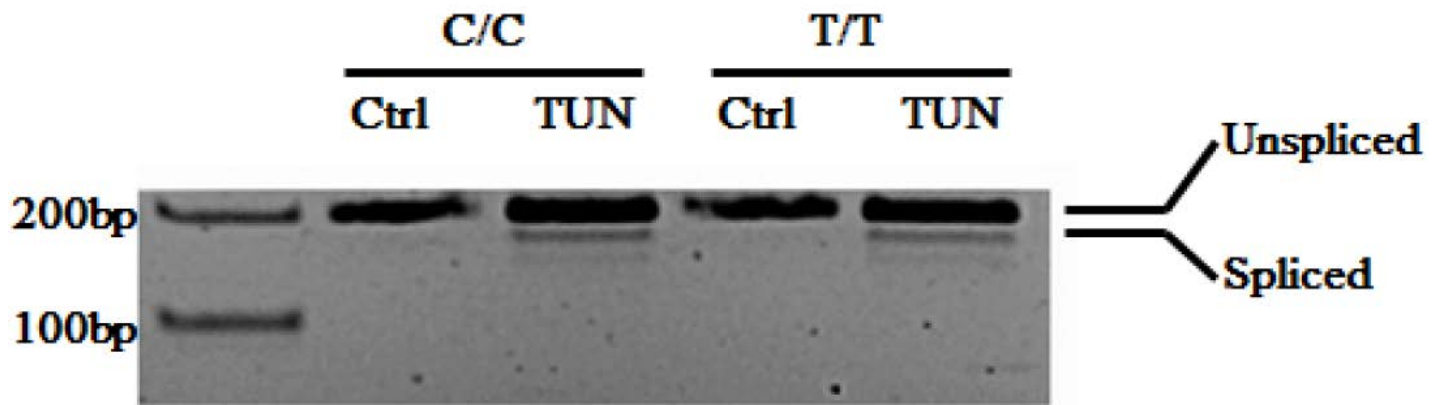

**Supplementary Figure 3.** The expression of *DNMT1* in the ARPE-19 cells before or after shRNA treatment. *DNMT1* was used as an endogenous control to test the off-target effect of shRNA. The results showed that the expression of *DNMT1* gene remained the same before or after shRNA treatment.

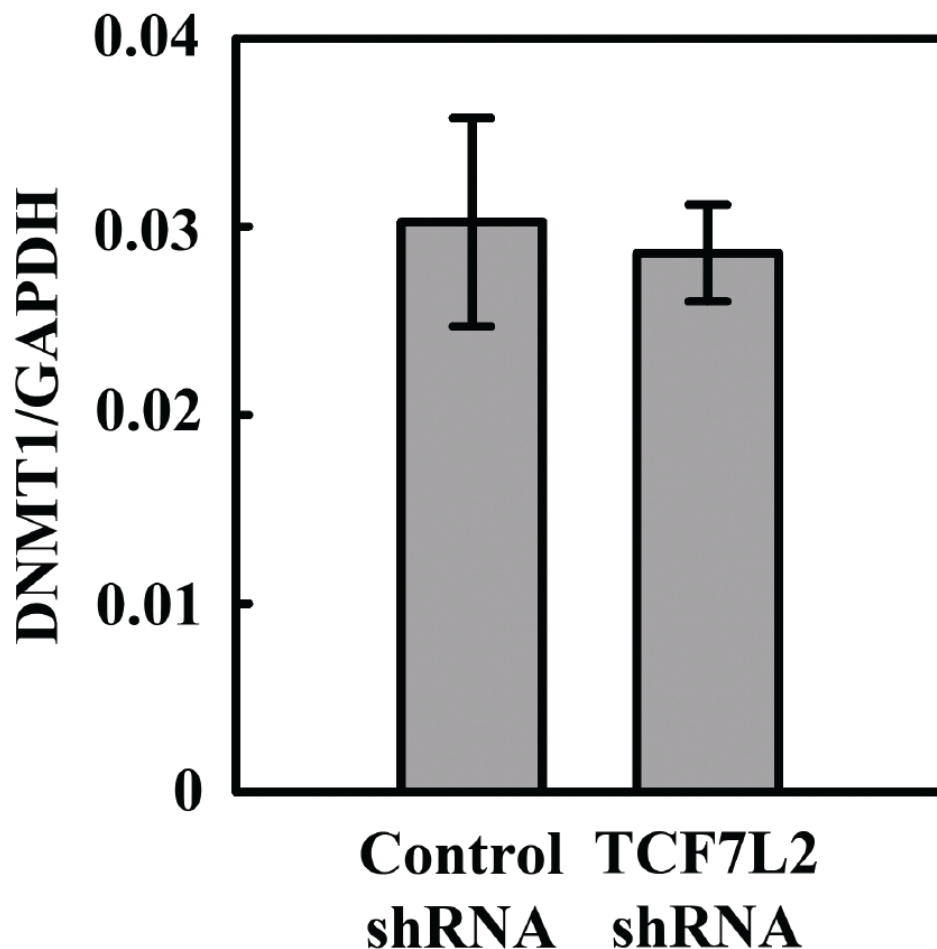

SUPPLEMENTARY DATA

**Supplementary Figure 4.** Activation of ER stress in the retinas of OIR mice. A. Western blot analysis of p-eIF2 $\alpha$  in the normal and OIR mice retinas. B. Compared with normal mice retinas, the protein level was significantly upregulated in OIR mice retinas by calculating the intensity ratio of p-eIF2 $\alpha$ / $\beta$ -actin (n = 3). \*denotes  $P < 0.05$ .

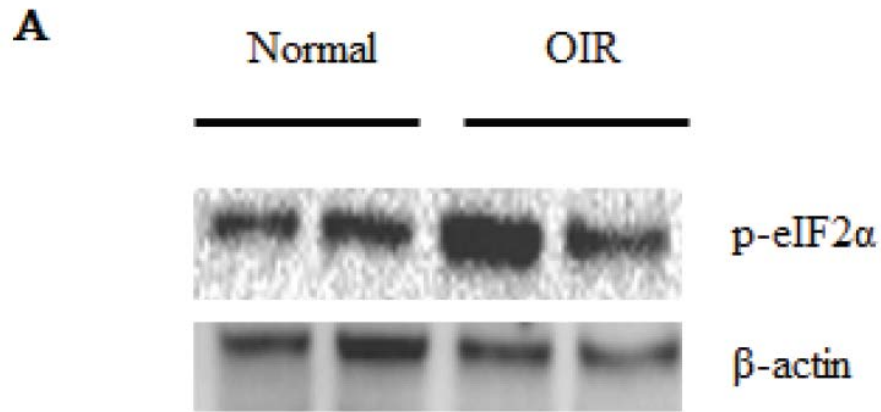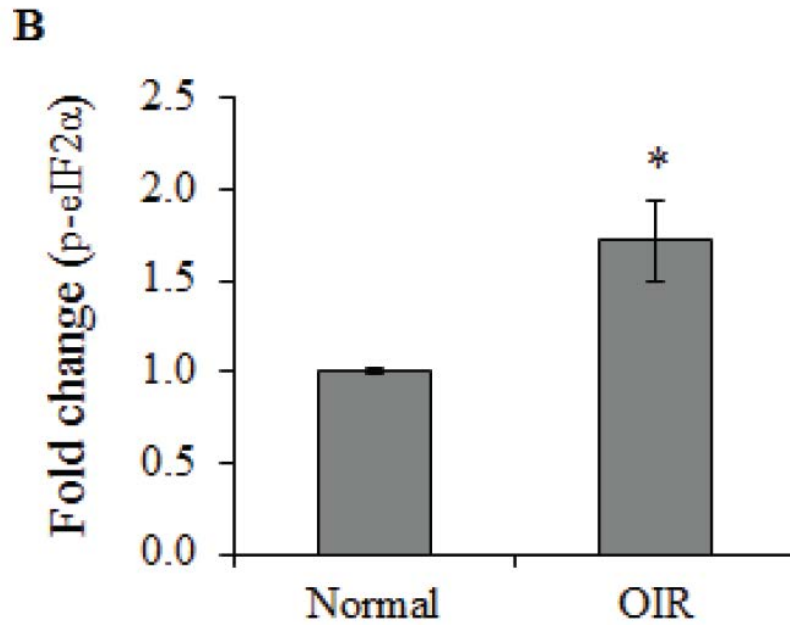

SUPPLEMENTARY DATA

**Supplementary Table 1.** Characteristics of the studied populations.

| Items                    | Caucasian (Discovery cohort) |                        |          | Caucasian (Replication cohort) |                        |          |
|--------------------------|------------------------------|------------------------|----------|--------------------------------|------------------------|----------|
|                          | T2DM-PDR<br>(n=209)          | T2DM-no DR<br>(n =442) | <i>P</i> | T2DM-PDR<br>(n =174)           | T2DM-no DR<br>(n =314) | <i>P</i> |
| Gender (m/f)             | 129/80                       | 252/190                | 0.255    | 109/65                         | 181/133                | 0.281    |
| Age (year)               | 65.02 ± 0.72                 | 69.79 ± 0.56           | <0.05    | 66.32 ± 0.85                   | 73.49 ± 0.62           | <0.05    |
| BMI (kg/m <sup>2</sup> ) | 32.65 ± 0.51                 | 31.57 ± 0.39           | <0.05    | 31.27 ± 0.50                   | 30.26 ± 0.37           | <0.05    |

The data are presented as mean ± SEM (standard error of the mean); *P*-values are calculated from *t*-test or Chi-square test when comparing T2DM-PDR and T2DM-no DR within population; m/f, male/female; BMI, body mass index.

**Supplementary Table 2.** The primers used for genotyping and qRT-PCR.

| Gene/SNP            | Sequence (5'-3')                                  |
|---------------------|---------------------------------------------------|
| <b>Genotyping</b>   |                                                   |
| rs7903146-Forward   | GGCTTTCTCTGCCTCAAAACCT                            |
| rs7903146-Reverse   | TCACTATGTATTGTTGCCAGTCAG                          |
| rs7903146-Extension | GCTGTTATTTACTGAACAATTAGAGAGCTAAGCACTTT<br>TTAGATA |
| <b>qPCR</b>         |                                                   |
| hGAPDH-Forward      | GAGTCAACGGATTTGGTCTG                              |
| hGAPDH-Reverse      | GACAAGCTTCCCGTTCTCAG                              |
| hTCF7L2-Forward     | TCAAACAGCTCCTCCGATTC                              |
| hTCF7L2-Reverse     | CCCTTAAAGAGCCCTCCATC                              |
| hVEGFA-Forward      | GGTCCCAGGCTGCACCCAT                               |
| hVEGFA-Reverse      | GATGGCTTGAAGATGTACTCGAT                           |
| hXBP1-Forward       | GCTGAAGAGGAGGCGGAAG                               |
| hXBP1-Reverse       | GTCCAGAATGCCAACAGG                                |
| hDNMT1-Forward      | CCCAGGATTACAAGGAAAAGC                             |
| hDNMT1-Reverse      | GGGTGTTGGTTCTTTGGTTTG                             |
| mGAPDH-Forward      | GTCAAGGCCGAGAATGGGAA                              |
| mGAPDH-Reverse      | TTGGCTCCACCCTTCAAGTG                              |
| mTCF7L2-Forward     | GCCTCCGCACCCTCCAGATATCT                           |
| mTCF7L2-Reverse     | GTGTGATGGGGAGGGACCATAT                            |
| mVEGFA-Forward      | GGTGGACATCTTCCAGGAGT                              |
| mVEGFA-Reverse      | TGATCTGCATGGTGATGTTG                              |

SUPPLEMENTARY DATA

**Supplementary Table 3.** Genotype and association results of *TCF7L2*-rs7903146 in patients with T1DM-PDR and T1DM-no DR.

| Group                                 | T1DM-PDR                | T1DM-no DR |
|---------------------------------------|-------------------------|------------|
| Sample size, n                        | 372                     | 417        |
| CC genotype, n                        | 200                     | 196        |
| CT genotype, n                        | 136                     | 189        |
| TT genotype, n                        | 36                      | 32         |
| T allele frequency                    | 0.280                   | 0.303      |
| HWE <i>p</i> value                    | 0.075                   | 0.140      |
| Allelic <i>P</i> value, OR (95% CI)   | 0.300, 0.89 (0.71-1.11) |            |
| Dominant <i>P</i> value, OR (95% CI)  | 0.058, 0.76 (0.57-1.02) |            |
| Recessive <i>P</i> value, OR (95% CI) | 0.317, 1.29 (0.76-2.18) |            |

HWE, Hardy-Weinberg equilibrium; OR (95% CI), odds ratio with 95% confidence interval; *P*, *P*-value calculated from  $\chi^2$  test.

SUPPLEMENTARY DATA

**Supplementary Table 4.** Distribution of genotype of the *TCF7L2*- rs7903146 in Caucasian T2DM and Control populations.

| Study (Ref. No.) | Year | Allelic <i>P</i> value | Genotype distribution |      |      |      |                         |          |      |       |       |                         | Frequency of the risk allele (T) (%) |             |
|------------------|------|------------------------|-----------------------|------|------|------|-------------------------|----------|------|-------|-------|-------------------------|--------------------------------------|-------------|
|                  |      |                        | Cases                 |      |      |      |                         | Controls |      |       |       |                         | Cases                                | Controls    |
|                  |      |                        | N                     | TT   | CT   | CC   | <i>p</i> <sub>HWE</sub> | N        | TT   | CT    | CC    | <i>p</i> <sub>HWE</sub> |                                      |             |
| Grant (1)        | 2006 | 1.64E-07               | 350                   | 64   | 155  | 131  | 0.321                   | 494      | 39   | 201   | 254   | 0.996                   | 40.4                                 | 28.2        |
| Cauchi (2)       | 2006 | 6.02E-35               | 2367                  | 431  | 1149 | 787  | 0.949                   | 2499     | 231  | 1060  | 1208  | 0.998                   | 42.5                                 | 30.5        |
| Groves (3)       | 2006 | 1.09E-11               | 2001                  | 270  | 960  | 771  | 0.570                   | 2476     | 217  | 1084  | 1175  | 0.334                   | 37.5                                 | 30.7        |
| Kimber (4)       | 2007 | 5.10E-14               | 3225                  | 361  | 1459 | 1405 | 0.826                   | 3291     | 248  | 1329  | 1714  | 0.909                   | 33.8                                 | 27.7        |
| Marzi (5)        | 2007 | 7.73E-05               | 651                   | 73   | 296  | 282  | 0.939                   | 1641     | 121  | 678   | 842   | 0.623                   | 33.9                                 | 28.0        |
| Van V-O (6)      | 2007 | 4.39E-05               | 496                   | 72   | 221  | 203  | 0.645                   | 907      | 83   | 365   | 459   | 0.699                   | 36.8                                 | 29.3        |
| Humphries (7)    | 2006 | 8.56E-14               | 1459                  | 193  | 665  | 601  | 0.914                   | 2493     | 197  | 1001  | 1295  | 0.983                   | 36.0                                 | 28.0        |
| Sladek (8)       | 2007 | 4.41E-20               | 694                   | 149  | 348  | 197  | 0.980                   | 654      | 65   | 254   | 335   | 0.266                   | 46.5                                 | 29.4        |
| Sladek (8)       | 2007 | 1.06E-34               | 2499                  | 408  | 1215 | 876  | 0.652                   | 2849     | 238  | 1194  | 1417  | 0.854                   | 40.6                                 | 29.3        |
| Cauchi (9)       | 2007 | 3.00E-07               | 486                   | 78   | 208  | 200  | 0.163                   | 1075     | 88   | 432   | 555   | 0.954                   | 37.4                                 | 28.3        |
| De Silva (10)    | 2007 | 2.45E-04               | 487                   | 70   | 208  | 209  | 0.303                   | 2099     | 180  | 887   | 1032  | 0.862                   | 35.7                                 | 29.7        |
| <b>Our study</b> | 2012 | 1.56E-13               | 1139                  | 156  | 507  | 476  | 0.259                   | 3835     | 298  | 1544  | 1993  | 0.965                   | 36.0                                 | 27.9        |
| <b>Pooled</b>    |      | 8.86E-160              | 15854                 | 2325 | 7391 | 6138 | 0.193                   | 24313    | 2005 | 10029 | 12279 | 0.499                   | <b>38.0</b>                          | <b>28.9</b> |

HWE, Hardy-Weinberg equilibrium; *P*, *P*-value calculated from  $\chi^2$  test.

## SUPPLEMENTARY DATA

### REFERENCES

1. Grant SF, Thorleifsson G, Reynisdottir I, et al. Variant of transcription factor 7-like 2 (TCF7L2) gene confers risk of type 2 diabetes. *Nat Genet* 2006;3:320-323.
2. Cauchi S, Meyre D, Dina C, et al. Transcription factor TCF7L2 genetic study in the French population: expression in human beta-cells and adipose tissue and strong association with type 2 diabetes. *Diabetes* 2006;10:2903-2908.
3. Groves CJ, Zeggini E, Minton J, et al. Association analysis of 6,736 U.K. subjects provides replication and confirms TCF7L2 as a type 2 diabetes susceptibility gene with a substantial effect on individual risk. *Diabetes* 2006;9:2640-2644.
4. Kimber CH, Doney AS, Pearson ER, et al. TCF7L2 in the Go-DARTS study: evidence for a gene dose effect on both diabetes susceptibility and control of glucose levels. *Diabetologia* 2007;6:1186-1191.
5. Marzi C, Huth C, Kolz M, et al. Variants of the transcription factor 7-like 2 gene (TCF7L2) are strongly associated with type 2 diabetes but not with the metabolic syndrome in the MONICA/KORA surveys. *Horm Metab Res* 2007;1:46-52.
6. van Vliet-Ostaptchouk JV, Shiri-Sverdlov R, Zhernakova A, et al. Association of variants of transcription factor 7-like 2 (TCF7L2) with susceptibility to type 2 diabetes in the Dutch Breda cohort. *Diabetologia* 2007;1:59-62.
7. Humphries SE, Gable D, Cooper JA, et al. Common variants in the TCF7L2 gene and predisposition to type 2 diabetes in UK European Whites, Indian Asians and Afro-Caribbean men and women. *J Mol Med (Berl)* 2006;12:1005-1014.
8. Sladek R, Rocheleau G, Rung J, et al. A genome-wide association study identifies novel risk loci for type 2 diabetes. *Nature* 2007;7130:881-885.
9. Cauchi S, El Achhab Y, Choquet H, et al. TCF7L2 is reproducibly associated with type 2 diabetes in various ethnic groups: a global meta-analysis. *J Mol Med (Berl)* 2007;7:777-782.
10. De Silva NM, Steele A, Shields B, et al. The transcription factor 7-like 2 (TCF7L2) gene is associated with Type 2 diabetes in UK community-based cases, but the risk allele frequency is reduced compared with UK cases selected for genetic studies. *Diabet Med* 2007;10:1067-1072.
